# Supplementary material for: Preserving client autonomy when guiding medicine taking in telehomecare: A conversation analytic case study
Source: PubMed Central journal article supplement (PMC9127937; doi:10.1177/09697330211051004), 2022-02-04
Supplement: sj-pdf-1-nej-10.1177_09697330211051004.pdf [file sj-pdf-1-nej-10.1177_09697330211051004.pdf]

Supplementary material 1: Data extracts with original Finnish data and English translations

Extract 1: Straightforward guiding to take the medicine and the lack of visual cues lead to confusion

N: [ ihan ] kiva.  
[pretty] nice.  
C: [ mm. ]  
(.)  
C: mm?  
(0.2)  
C: niin o.  
it is.  
(0.5)  
N: joo.  
yes.  
(0.4)  
N: †joo:.  
†ye:s.

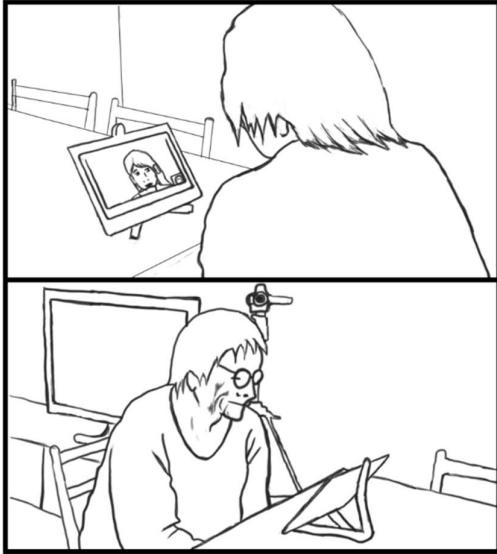

IMG 1.1

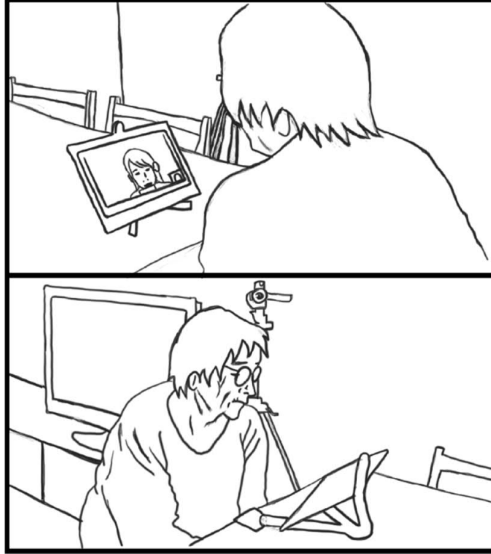

IMG 1.2

01 N: .hh (.) #tuota, (.) menisiks sää sen: sun %iltalääkkeen# ottaa.  
.hh (.) #well, (.) would you go and take that evening %medicine# of yours.  
c: %raises eyebrows  
#IMG 1.1 #IMG 1.2

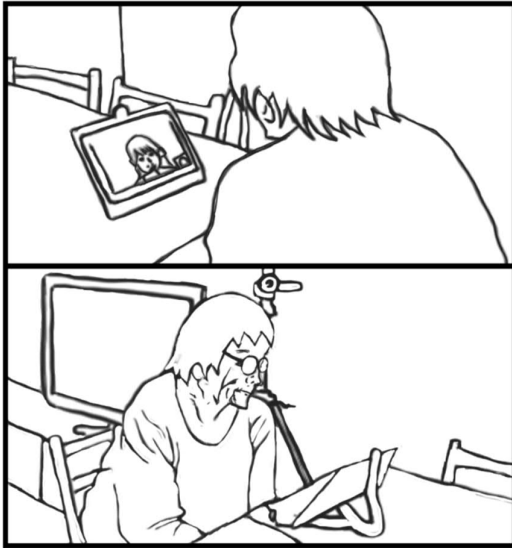

IMG 1.3

02 (0.7)#%(2.4)

c: %frowns  
#IMG 1.3

03 C: .mt jasso.

04 (1.3) ((The client stares at the screen of the tablet.))

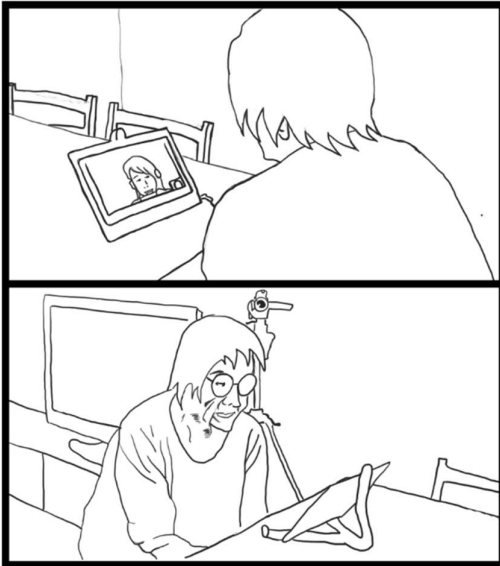

IMG 1.4

05 N: jo[o.] [ kälyks=s[ä ot%] t a[#massa,]  
ye[s.] [wou]ld=yo[u go%]and [#take, ]

06 C: [(n]o [m- ] [mis-%] [#missä-] (.) missäs ne nyt  
[we]ll [wh-] [whe-%] [#where-] (.) where are they

c: %turns to right  
#IMG 1.4

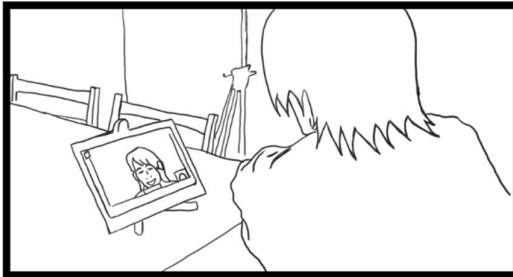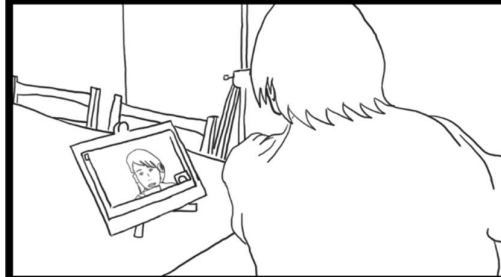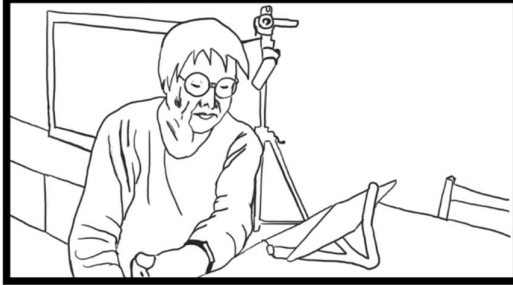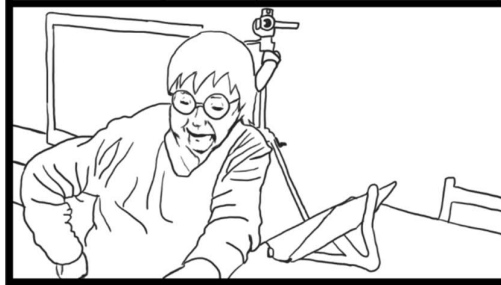

IMG 1.5

IMG 1.6

07 C: **sitten onkaan.#=**  
again.#=

#IMG 1.5

08 C: **=ne on sie-**  
=they are there-

09 (0.5)

10 C: .hhhh

11 (0.6)

12 N: [**#ne on siel kei]ttiön <pöydälläh.>**  
[#they are there on the kitchen <tableh.>

13 C: [**# °het-kine?°** ]  
[# °just a moment?° ]  
#IMG 1.6

14 N: (0.2)%(0.5)

c: %stands up and walks to kitchen->

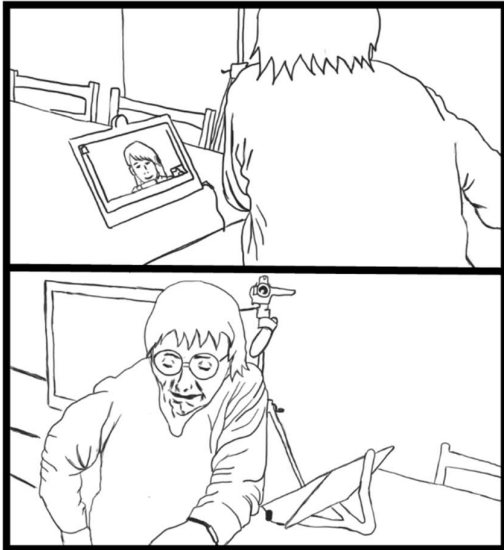

IMG 1.7

15 C: #aha?

#oh?

#IMG 1.7

16 (0.5)

17 C: **no minäpä** kävele.

well I'll go.

18 (0.8)

Extract 2: Stepwise entry into medicine taking affords a seamless transition.

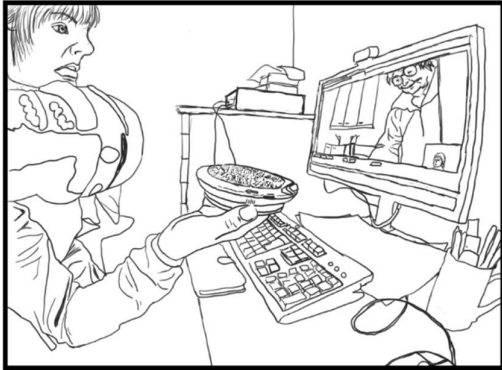

IMG 2.1

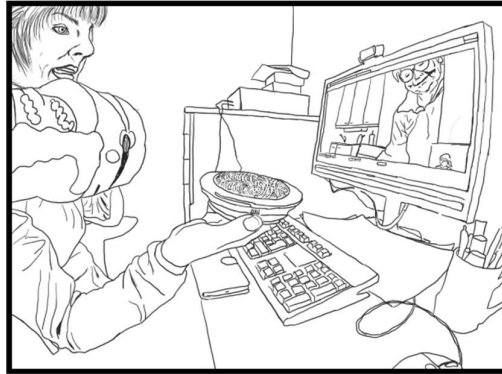

IMG 2.2

01 N: .hhh #sulla,(.) on siellä % ↑ilta#lääkkeet eikö vaan.=  
 .hhh #you, (.) have the %↑evening# medicine there don't you.=  
 c: %shifts gaze to nurse and then down to right  
 #IMG 2.1 #IMG 2.2

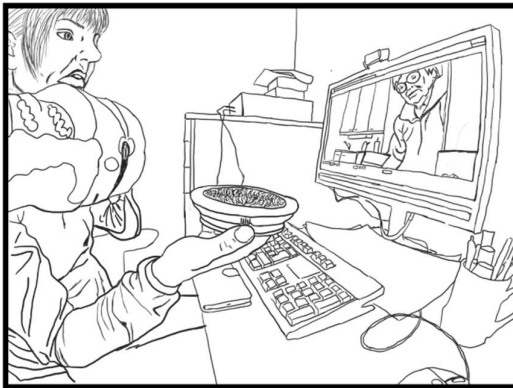

IMG 2.3

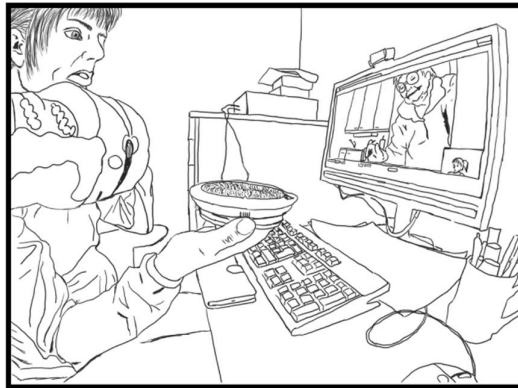

IMG 2.4

02 N: =ni? (.) #%ootko sää #ne=jo ottanu.  
 = so? (.) #%have you #taken=them already.  
 c: %leans to right and reaches with right hand  
 #IMG 2.3 #IMG 2.4

03 (1.5)

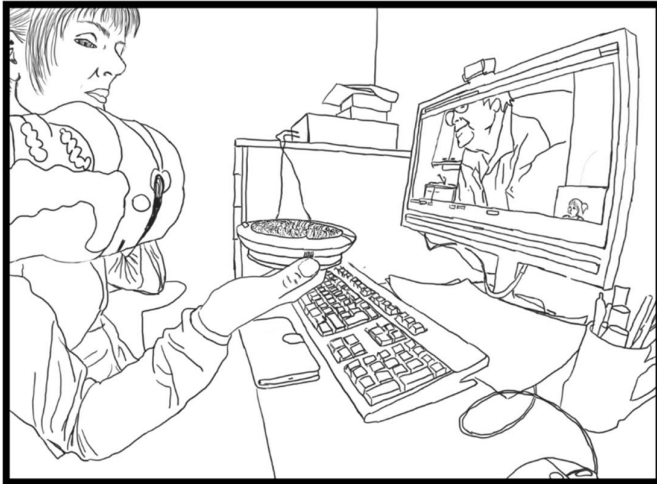

IMG 2.5

04 C: #emmää=nyt ↑iltaa vielä oo ottanu.  
 #well=I haven't taken the ↑evening ones yet.  
 #IMG 2.5

05 (0.2)

06 N: ↑ni?  
 ↑yes?

07 (1.0)

08 C: ( - ) ((joo /jaha))  
 (yeah.)

09 (.)

10 C: nyt on kaikissa purkissa jotai.  
 now every jar has something.

11 (0.5)

12 N: fo(h)ok(h)e:i?f  
 fo(h)ok(h)a:y?f

13 (0.3)

14 C: h[h ] [heh heh heh] [(-)][ ((inaudible)) ]

15 N: [.h]hh (.) sää [voisit mel]kein ne il[tal][ääkkeet ottaa. ]  
 [.h]hh (.) you [could actual]ly take t[he ][evening medicine.]

16 N: ja [jätt]ää si[tte-] (0.2) yölääkkeit:=sinne, (0.4) ennen kun menet  
 and [leav]e th[en- ] (0.2) night medicine:=for, (0.4) when you go to

17 C: [(-)a] [(-) ]

18 N: n[ u k ]kumaa.  
 b[ed ]

19 C: [ (ni?) ]  
 [(yeah?)]

20 (1.4)

## Supplementary material 2: Transcription symbols in the data extracts

|          |                                                                                        |
|----------|----------------------------------------------------------------------------------------|
| [word]   | Brackets: onset and offset of overlapping talk                                         |
| =        | Equals sign: contiguous utterances, second is latched immediately onto the first       |
| (0.2)    | Timed interval within or between utterances, measured in seconds and tenths of seconds |
| (.)      | Interval of less than 0.2 s                                                            |
| wo:rd    | Colon: extension of the sound or syllable                                              |
| .        | Full stop: falling intonation                                                          |
| ,        | Comma: continuing intonation                                                           |
| ?        | Question mark: rising intonation1                                                      |
| ↑        | Upward arrow: Rising pitch                                                             |
| wo-      | Dash: abrupt cut-off                                                                   |
| WORD     | Capital letters: louder volume                                                         |
| <word>   | Slower-paced talk than the surrounding talk                                            |
| °word°   | Degree signs: quieter volume                                                           |
| hh       | Audible aspiration.                                                                    |
| hh       | Audible inhalation                                                                     |
| w(h)ord  | Laughter                                                                               |
| (---)    | Lines in paranthesis: Unclear and unidentifiable talk                                  |
| ((word)) | Text in parentheses: transcriber's comments                                            |
| %        | Percentile sign: The clients bodily actions                                            |
| #        | Hash sign: The timing /location of the images                                          |
